# Supplementary material
Source: Springer Nature journal article supplement (https://www.springermedizin.de/resource/supplementary/12958_2010_780_MOESM1_ESM.pdf/9568482)

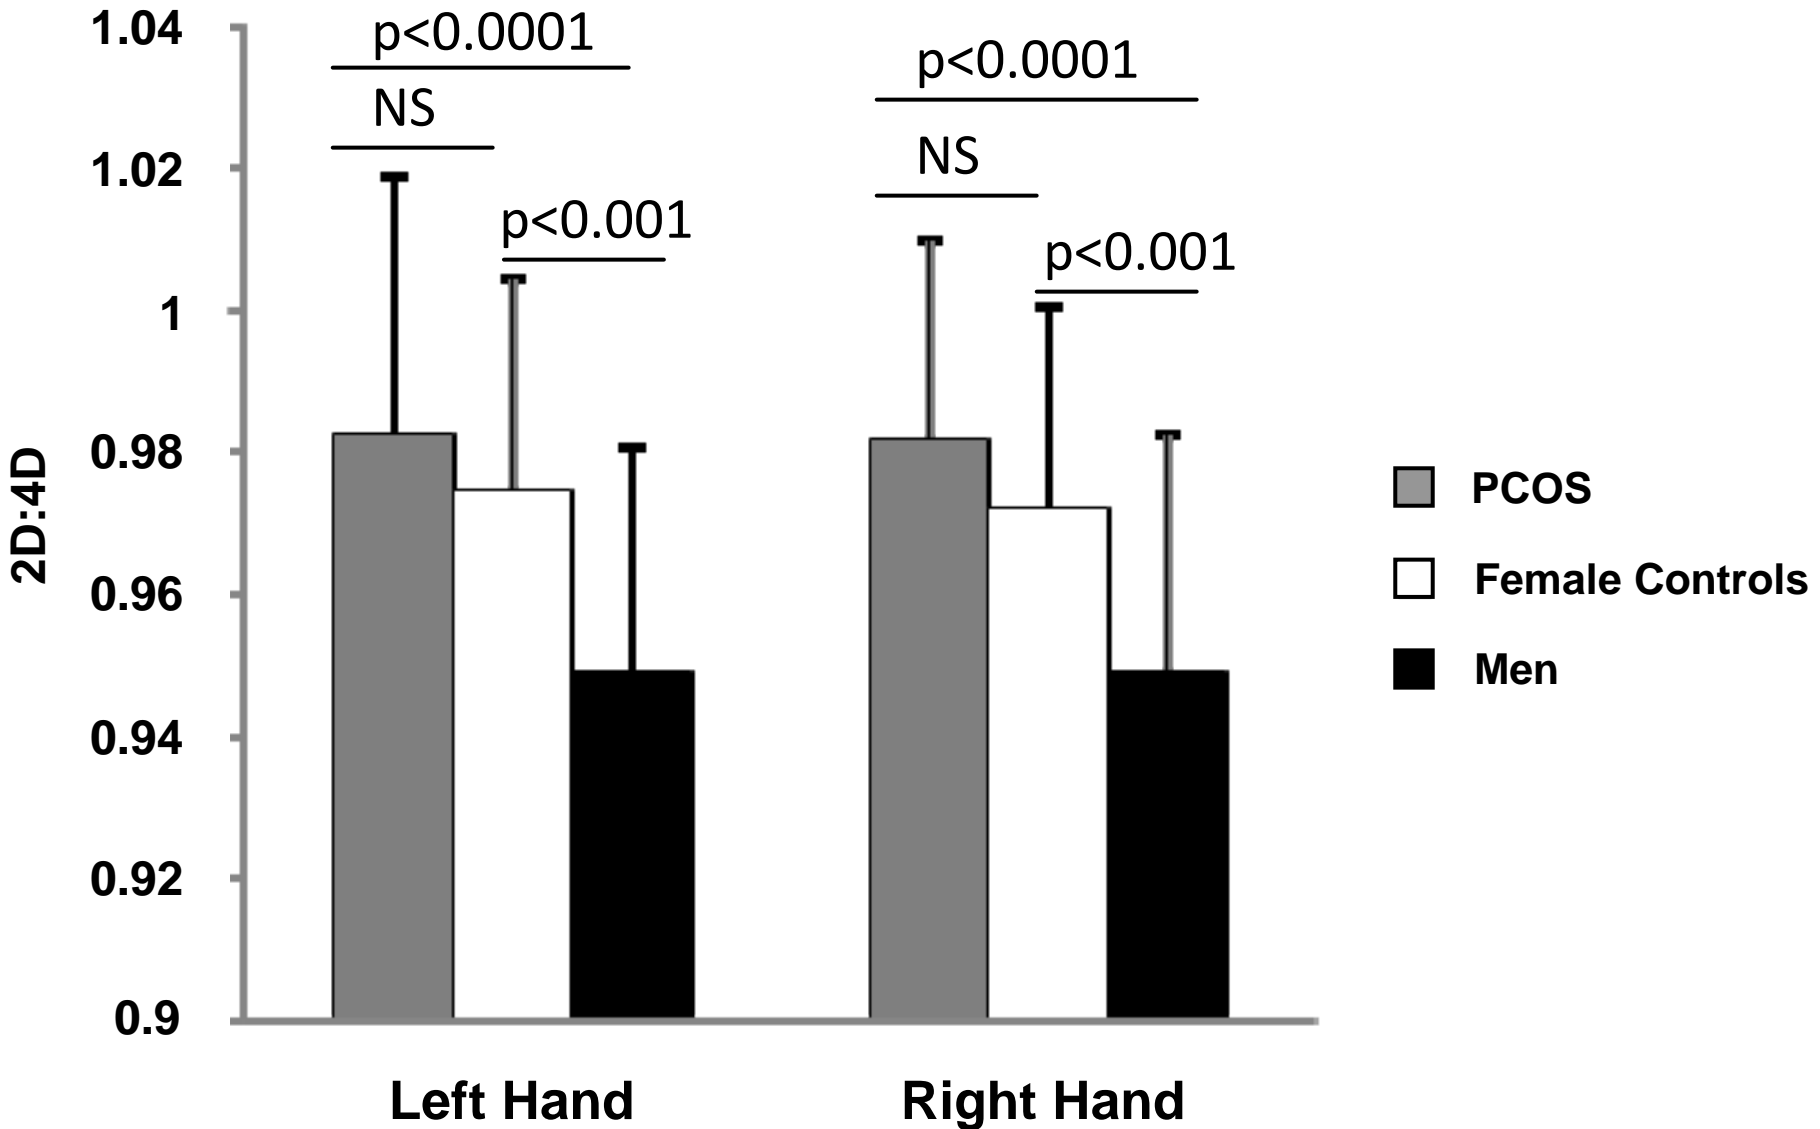

Supplement: MOESM1 [file 9568482]
